# Supplementary material
Source: Royal Society of Chemistry journal article supplement (doi:10.1039/d6fb00024j)
Supplement: d6fb00024j1.pdf [file d6fb00024j1.pdf]

**SUPPLEMENTARY INFORMATION**

**Biorefining of crab shells for protein recovery using Natural Deep Eutectic Solvents:**

**Physicochemical and functional characterization of crab shell proteins**

**Tharuka Wijesekara<sup>1</sup>, Idaresit Ekaette<sup>1,2\*</sup>**

<sup>1</sup> Department of Food Science and Agricultural Chemistry, McGill University, Ste-Anne-de-Bellevue, Quebec, Canada H9X 3V9.

<sup>2</sup> Department of Bioresource Engineering, McGill University, Ste-Anne-de-Bellevue, Quebec, Canada H9X 3V9.

Corresponding author: [Idaresit.ekaette@mcgill.ca](mailto:Idaresit.ekaette@mcgill.ca)

### Assumptions used for cost estimation

The NADES systems used in this study included ChCl-lactic acid and ChCl-glycerol (1:2 ratio) as well as ChCl-malic acid and ChCl-malonic acid (1:1 ratio). Based on laboratory-scale chemical prices, the estimated costs were approximately \$117/kg (ChCl-glycerol), \$175/kg (ChCl-lactic acid), \$167/kg (ChCl-malic acid), and \$340/kg (ChCl-malonic acid), with an average cost of about \$200/kg.

- NADES preparation basis: 1 kg total solvent
- Recovery efficiency: 90% (only 10% required per cycle)
- Ratios:
  - ChCl:Lactic acid (1:2)
  - ChCl:Glycerol (1:2)
  - ChCl:Malic acid (1:1)
  - ChCl:Malonic acid (1:1)
- Raw material prices
  - Choline chloride = \$240/kg
  - Lactic acid = \$71 per 500 g = \$142/kg
  - Glycerol = \$55/kg
  - Malic acid = \$47 per 500 g = \$94/kg
  - Malonic acid = \$220 per 500 g = \$440/kg
- Crab shells = \$0 (waste material)

### Rough NADES Cost Estimate (per 1 kg solvent)

| NADES system      | Ratio | Composition for 1 kg           | Cost without recovery (\$)                          | Cost per cycle with 90% recovery (\$) |
|-------------------|-------|--------------------------------|-----------------------------------------------------|---------------------------------------|
| ChCl–Lactic acid  | 1:2   | ChCl 0.333 + Lactic acid 0.667 | $(0.333 \times 240) + (0.667 \times 142) = \$174.7$ | \$17.5                                |
| ChCl–Glycerol     | 1:2   | ChCl 0.333 + Glycerol 0.667    | $(0.333 \times 240) + (0.667 \times 55) = \$116.7$  | \$11.7                                |
| ChCl–Malic acid   | 1:1   | ChCl 0.5 + Malic acid 0.5      | $(0.5 \times 240) + (0.5 \times 94) = \$167.0$      | \$16.7                                |
| ChCl–Malonic acid | 1:1   | ChCl 0.5 + Malonic acid 0.5    | $(0.5 \times 240) + (0.5 \times 440) = \$340.0$     | \$34.0                                |
